# Supplementary material
Source: PubMed Central journal article supplement (PMC2518045)

**Supplementary Figure Legends**

S1. Analysis of MsrA-mediated  $\alpha$ -synuclein repair by MALDI-MS. Positive-ion mass spectra were collected for RP-HPLC fractions corresponding to (A) unoxidized  $\alpha$ -synuclein (see Figure 8A); (B)  $\alpha$ -synuclein oxidized by incubation with  $H_2O_2$  (see Figure 8B); (C-E) oxidized  $\alpha$ -synuclein after incubation with recombinant MsrA, peak 1 (C), peak 2 (D), and peak 3 (E) (see Figure 8C).

Supplementary Figure 1

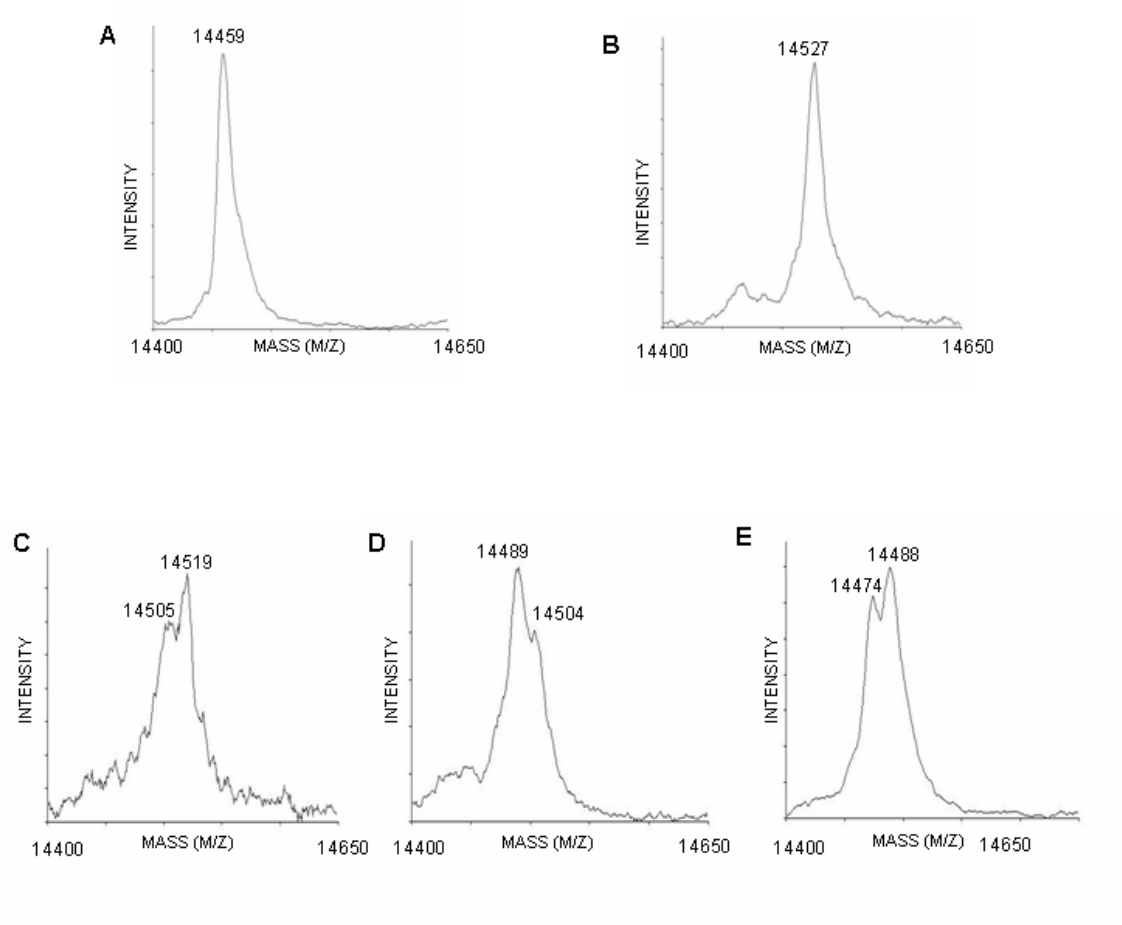

Supplement: NIHMS56598-supplement-01.pdf [file NIHMS56598-supplement-01.pdf]
